# Supplementary material for: Risk assessment of transgene introgression from genetically modified soybean into its wild relatives
Source: Research Square preprint supplement (doi:10.21203/rs.3.rs-1828244/v1), 2022-10-04
Supplement: Supplementary file 1 [file b7cc326932558321afd6a3c3.docx]

**Risk assessment of transgene introgression from genetically modified soybean into its wild relatives**

Li Zhang1,2, Laipan Liu1,2, Zhixiang Fang1,2, Wenjing Shen1,2, Ying Dai1,2, Ruizong Jia3, Jingang Liang4,*,b, Biao Liu1,2,4,*,a

1Key Laboratory on Biosafety of Nanjing Institute of Environmental Sciences, Ministry of Ecology and Environment, Nanjing, 210042, China

2State Environmental Protection Scientific Observation and Research Station for Ecology and Environment of Wuyi Mountains, Nanjing Institute of Environmental Sciences, Ministry of Ecology and Environment, Nanjing, China

3Hainan Key Laboratory for Biosafety Monitoring and Molecular Breeding in off-Season Reproduction Regions, Sanya, China

4Development Center of Science and Technology, Ministry of Agriculture and Rural Affairs, Beijing 100176, China

*Corresponding author.

a Biao Liu: 85287064@163.com

b Jingang Liang:[liangjingang@agri.gov.cn](mailto:liangjingang@agri.gov.cn)

**Supplementary information**

Genotyping assay for F2 and F3 generations

QPCR and dPCR assays were used to identify RR, RS and SS genotypes of the F2 and F3 populations, and full data of the genotype test results are available in Table S1 and Table S2.

**Table S1** Detection of EPSPS by real-time quantitative PCR and EPSPS test strip

| Material | Ct values of EPSPS gene | Ct values of lectin | ∆ct | Detection results | EPSPS test strip |
| --- | --- | --- | --- | --- | --- |
| F2-1 | 20.27 | 20.81 | 0.54 | P | P |
| F2-2 | 26.85 | 25.64 | 1.21 | P | P |
| F2-3 | 25.97 | 25.13 | 0.84 | P | P |
| F2-4 | Undetermined | 25.43 |  | N | N |
| F2-5 | 27.25 | 27.91 | 0.66 | P | P |
| F2-6 | 25.75 | 27.38 | 1.63 | P | P |
| F2-7 | Undetermined | 24.19 |  | N | N |
| F2-8 | 26 | 25.08 | 0.92 | P | P |
| F2-9 | 25.72 | 25.82 | -0.1 | P | P |
| F2-10 | 24.45 | 25.73 | 1.28 | P | P |
| F2-11 | Undetermined | 25.51 |  | N | N |
| F2-12 | 24.31 | 23.54 | 0.77 | P | P |
| F2-13 | 25.09 | 26.64 | 1.55 | P | P |
| F2-14 | 25.66 | 24.87 | 0.79 | P | P |
| F2-15 | Undetermined | 24.89 |  | N | N |
| F2-16 | 20.86 | 21.89 | 1.03 | P | P |
| F2-17 | 25.35 | 26.13 | 0.78 | P | P |
| F2-18 | 26.44 | 26.12 | 0.32 | P | P |
| F2-19 | 25.25 | 23.68 | 1.57 | P | P |
| F2-20 | Undetermined | 23.98 |  | N | N |
| F2-21 | 26.94 | 26.44 | 0.5 | P | P |
| F2-22 | 25.34 | 26.66 | 1.32 | P | P |
| F2-23 | 24.09 | 25.91 | 1.82 | P | P |
| F2-24 | Undetermined | 24.98 |  | N | N |
| F2-25 | 26.59 | 25.73 | 0.86 | P | P |
| F2-26 | 24.97 | 24.94 | 0.03 | P | P |
| F2-27 | 21.02 | 22.5 | 1.48 | P | P |
| F2-28 | Undetermined | 25.67 |  | N | N |
| F2-29 | 26.76 | 26.91 | 0.15 | P | P |
| F2-30 | 23.91 | 26.08 | 2.17 | P | P |
| F2-31 | 24.05 | 25.46 | 1.41 | P | P |
| F2-32 | Undetermined | 25.32 |  | N | N |
| F2-33 | 26.65 | 25.14 | 1.51 | P | P |
| F2-34 | 27.77 | 26.19 | 1.58 | P | P |
| F2-35 | 25.15 | 24.91 | 0.24 | P | P |
| F2-36 | 25.97 | 26.84 | 0.87 | P | P |
| F2-37 | Undetermined | 25.18 |  | N | N |
| F2-38 | 23.25 | 24.79 | 1.54 | P | P |
| F2-39 | 24.88 | 23.63 | 1.25 | P | P |
| F2-40 | 24.32 | 25.39 | 1.07 | P | P |
| F2-41 | 24.78 | 23.26 | 1.52 | P | P |
| F2-42 | Undetermined | 25.17 |  | N | N |
| F2-43 | 22.68 | 24.52 | 1.84 | P | P |
| F2-44 | 22.29 | 22.85 | 0.56 | P | P |
| F2-45 | 26.56 | 25.48 | 1.08 | P | P |
| F2-46 | 26.18 | 25.01 | 1.17 | P | P |
| F2-47 | 25.21 | 23.8 | 1.41 | P | P |
| F2-48 | 25.99 | 26.11 | 0.12 | P | P |
| F2-49 | Undetermined | 24.98 |  | N | N |
| F2-50 | Undetermined | 25.01 |  | N | N |
| F2-51 | 28.92 | 26.93 | 1.99 | P | P |
| F2-52 | 25.16 | 27.04 | 1.88 | P | P |
| F2-53 | 28.89 | 29.86 | 0.97 | P | P |
| F2-54 | Undetermined | 23.93 |  | N | N |
| F2-55 | 27.21 | 26.65 | 0.56 | P | P |
| F2-56 | 26.72 | 25.47 | 1.25 | P | P |
| F2-57 | 26.39 | 25.24 | 1.15 | P | P |
| F2-58 | Undetermined | 24.97 |  | N | N |
| F2-59 | 26.66 | 26.88 | 0.22 | P | P |
| F2-60 | 26.74 | 26.69 | 0.05 | P | P |
| F2-61 | 27.2 | 26.92 | 0.28 | P | P |
| F2-62 | 26.3 | 26.73 | 0.43 | P | P |
| F2-63 | Undetermined | 25.81 |  | N | N |
| F2-64 | 25.09 | 25.95 | 0.86 | P | P |
| F2-65 | 25.92 | 26.05 | 0.13 | P | P |
| F2-66 | Undetermined | 25.31 |  | N | N |
| F2-67 | 25.6 | 25.74 | 0.14 | P | P |
| F2-68 | Undetermined | 26.01 |  | N | N |
| F2-69 | 26.92 | 26.13 | 0.79 | P | P |
| F2-70 | 24.63 | 26.29 | 1.66 | P | P |
| F2-71 | Undetermined | 25.52 |  | N | N |
| F2-72 | 25.36 | 25.26 | 0.1 | P | P |
| F2-73 | 26.97 | 26.41 | 0.56 | P | P |
| F2-74 | 25.89 | 25.81 | 0.08 | P | P |
| F2-75 | 23.97 | 24.66 | 0.69 | P | P |
| F2-76 | Undetermined | 25.71 |  | N | N |
| F2-77 | 27.62 | 27.7 | 0.08 | P | P |
| F2-78 | Undetermined | 25.94 |  | N | N |
| F2-79 | 28.07 | 28.85 | 0.78 | P | P |
| F2-80 | 25.03 | 27.05 | 2.02 | P | P |
| F2-81 | 22.14 | 22.38 | 0.24 | P | P |
| F2-82 | 25.52 | 25.68 | 0.16 | P | P |
| F2-83 | 20.57 | 20.53 | 0.04 | P | P |
| F2-84 | 25.3 | 25.61 | 0.31 | P | P |
| F2-85 | 26.03 | 24.63 | 1.4 | P | P |
| F2-86 | Undetermined | 23.98 |  | N | N |
| F2-87 | 25.59 | 26.37 | 0.78 | P | P |
| F2-88 | 25.55 | 23.98 | 1.57 | P | P |
| F2-89 | 23.64 | 22.79 | 0.85 | P | P |
| F2-90 | 26.09 | 26.54 | 0.45 | P | P |
| F2-91 | 24.54 | 24 | 0.54 | P | P |
| F2-92 | 24.8 | 24.65 | 0.15 | P | P |
| F2-93 | Undetermined | 25.21 |  | N | N |
| F2-94 | 25.59 | 26.35 | 0.76 | P | P |
| F2-95 | 26.34 | 26.07 | 0.27 | P | P |
| F2-96 | 27.74 | 27.4 | 0.34 | P | P |
| F2-97 | 26.43 | 26.6 | 0.17 | P | P |
| F2-98 | Undetermined | 25.61 |  | N | N |
| F2-99 | 28.12 | 25.66 | 2.46 | P | P |
| F2-100 | 24.56 | 26.55 | 1.99 | P | P |
| F2-101 | Undetermined | 25.39 |  | N | N |
| F2-102 | 25.63 | 25.72 | 0.09 | P | P |
| F2-103 | 24.57 | 24.91 | 0.34 | P | P |
| F2-104 | 23.36 | 24.02 | 0.66 | P | P |
| F2-105 | Undetermined | 24.95 |  | N | N |
| F2-106 | 24.85 | 24.18 | 0.67 | P | P |
| F2-107 | 25.05 | 25.6 | 0.55 | P | P |
| F2-108 | 24.53 | 25.17 | 0.64 | P | P |
| F2-109 | 25.75 | 26.92 | 1.17 | P | P |
| F2-110 | 25.68 | 25.12 | 0.56 | P | P |
| F2-111 | 26.92 | 25.79 | 1.13 | P | P |
| F2-112 | Undetermined | 25.76 |  | N | N |
| F2-113 | 26.53 | 26.74 | 0.21 | P | P |
| F2-114 | 26.33 | 26.68 | 0.35 | P | P |
| F2-115 | 23.67 | 24.54 | 0.87 | P | P |
| F2-116 | Undetermined | 24.83 |  | N | N |
| F2-117 | 23.83 | 24.82 | 0.99 | P | P |
| F2-118 | 23.27 | 22.67 | 0.6 | P | P |
| F2-119 | 21.81 | 22.17 | 0.36 | P | P |
| F2-120 | 23.72 | 24.61 | 0.89 | P | P |
| F2-121 | 22.82 | 22.39 | 0.43 | P | P |
| F2-122 | 25.86 | 25.55 | 0.31 | P | P |
| F2-123 | Undetermined | 24.45 |  | N | N |
| F2-124 | 24.79 | 23.87 | 0.92 | P | P |
| F2-125 | 25.15 | 26.23 | 1.08 | P | P |
| F2-126 | 26.45 | 26.88 | 0.43 | P | P |
| F2-127 | 26.58 | 25.77 | 0.81 | P | P |
| F2-128 | 28.67 | 27.03 | 1.64 | P | P |
| F2-129 | 26.96 | 27.43 | 0.47 | P | P |
| F2-130 | 24.05 | 26.01 | 1.96 | P | P |
| F2-131 | 24.91 | 24.64 | 0.27 | P | P |
| F2-132 | 25.82 | 25.76 | 0.06 | P | P |
| F2-133 | 25.7 | 25.94 | 0.24 | P | P |
| F2-134 | Undetermined | 24.59 |  | N | N |
| F2-135 | 26.6 | 25.19 | 1.41 | P | P |
| F2-136 | 26.01 | 25.85 | 0.16 | P | P |
| F2-137 | 28.25 | 28.3 | 0.05 | P | P |
| F2-138 | 29.11 | 28.72 | 0.39 | P | P |
| F2-139 | 23.94 | 25.27 | 1.33 | P | P |
| F2-140 | 23.97 | 23.35 | 0.62 | P | P |
| F2-141 | Undetermined | 25.19 |  | N | N |
| F2-142 | 25.73 | 24.83 | 0.9 | P | P |
| F2-143 | 24.67 | 24.85 | 0.18 | P | P |
| F2-144 | 28.22 | 28.14 | 0.08 | P | P |
| F2-145 | 26.63 | 25.13 | 1.5 | P | P |
| F2-146 | 26.4 | 27.79 | 1.39 | P | P |
| F2-147 | 25.25 | 25.43 | 0.18 | P | P |
| F2-148 | 25.7 | 24.43 | 1.27 | P | P |
| F2-149 | Undetermined | 24.94 |  | N | N |
| F2-150 | 25.67 | 27.17 | -1.5 | P | P |
| F2-151 | 26.82 | 25.72 | 1.1 | P | P |
| F2-152 | Undetermined | 23.98 |  | N | N |
| F2-153 | 25.86 | 25.81 | 0.05 | P | P |
| F2-154 | 24.76 | 24.86 | -0.1 | P | P |
| F2-155 | 24.49 | 26.73 | 2.24 | P | P |
| F2-156 | 24.33 | 24.75 | 0.42 | P | P |
| F2-157 | Undetermined | 26.74 |  | N | N |
| F2-158 | 24.71 | 25.14 | 0.43 | P | P |
| F2-159 | Undetermined | 25.97 |  | N | N |
| F2-160 | 25.59 | 26.03 | 0.44 | P | P |
| F2-161 | 26.25 | 26.62 | 0.37 | P | P |
| F2-162 | 23.88 | 24.82 | 0.94 | P | P |
| F2-163 | 25.34 | 26.75 | 1.41 | P | P |
| F2-164 | Undetermined | 25.13 |  | N | N |
| F2-165 | 23.84 | 24.88 | 1.04 | P | P |
| F2-166 | Undetermined | 23.42 |  | N | N |
| F2-167 | 24.33 | 25.19 | 0.86 | P | P |
| F2-168 | Undetermined | 25.18 |  | N | N |
| F3-1 | 20.57 | 20.7 | -0.13 | P | P |
| F3-2 | Undetermined | 25.71 |  | N | N |
| F3-3 | Undetermined | 26.43 |  | N | N |
| F3-4 | 26.65 | 25.33 | 1.32 | P | P |
| F3-5 | 25.98 | 24.67 | 1.31 | P | P |
| F3-6 | Undetermined |  |  | N | N |
| F3-7 | 25.59 | 25.69 | -0.1 | P | P |
| F3-8 | 25.55 | 24.23 | 1.32 | P | P |
| F3-9 | 24 | 23.76 | 0.24 | P | P |
| F3-10 | Undetermined | 24.57 |  | N | N |
| F3-11 | 25.29 | 23.85 | 1.44 | P | P |
| F3-12 | 24.86 | 24.78 | 0.08 | P | P |
| F3-13 | 21.2 | 21.62 | -0.42 | P | P |
| F3-14 | 25.72 | 26.36 | -0.64 | P | P |
| F3-15 | 26.33 | 26.13 | 0.2 | P | P |
| F3-16 | 25.26 | 24.06 | 1.2 | P | P |
| F3-17 | 25.45 | 23.95 | 1.5 | P | P |
| F3-18 | Undetermined | 26.39 |  | N | N |
| F3-19 | 24.6 | 26.97 | -2.37 | P | P |
| F3-20 | 24.96 | 26.38 | -1.42 | P | P |
| F3-21 | Undetermined | 25.46 |  | N | N |
| F3-22 | 29.08 | 28.46 | 0.62 | P | P |
| F3-23 | 24.66 | 24.16 | 0.5 | P | P |
| F3-24 | 24.82 | 24.64 | 0.18 | P | P |
| F3-25 | Undetermined | 26.19 |  | N | N |
| F3-26 | 25 | 26.06 | -1.06 | P | P |
| F3-27 | 25.01 | 26.77 | -1.76 | P | P |
| F3-28 | 24.67 | 25.51 | -0.84 | P | P |
| F3-29 | 25.84 | 26.69 | -0.85 | P | P |
| F3-30 | 25.84 | 24.54 | 1.3 | P | P |
| F3-31 | 26.92 | 26.2 | 0.72 | P | P |
| F3-32 | 25.09 | 24.19 | 0.9 | P | P |
| F3-33 | 27.04 | 26.69 | 0.35 | P | P |
| F3-34 | 26.55 | 27.37 | -0.82 | P | P |
| F3-35 | 24.08 | 25.43 | -1.35 | P | P |
| F3-36 | Undetermined | 24.93 |  | N | N |
| F3-37 | 24.64 | 24.47 | 0.17 | P | P |
| F3-38 | 24.05 | 23.65 | 0.4 | P | P |
| F3-39 | 21.88 | 23.56 | -1.68 | P | P |
| F3-40 | 23.61 | 24.04 | -0.43 | P | P |
| F3-41 | 22.64 | 23.58 | -0.94 | P | P |
| F3-42 | Undetermined | 23.44 |  | N | N |
| F3-43 | 25.68 | 24.03 | 1.65 | P | P |
| F3-44 | 24.61 | 22.98 | 1.63 | P | P |
| F3-45 | 24.96 | 26.66 | -1.7 | P | P |
| F3-46 | 26.2 | 26.83 | -0.63 | P | P |
| F3-47 | Undetermined | 25.76 |  | N | N |
| F3-48 | 27.95 | 27.43 | 0.52 | P | P |
| F3-49 | 25.88 | 26.66 | -0.78 | P | P |
| F3-50 | 29.37 | 29.57 | -0.2 | P | P |
| F3-51 | Undetermined | 26.79 |  | N | N |
| F3-52 | 29.28 | 29.76 | -0.48 | P | P |
| F3-53 | 28.79 | 29.57 | -0.78 | P | P |
| F3-54 | 27.34 | 29.08 | -1.74 | P | P |
| F3-55 | 27.22 | 27.41 | -0.19 | P | P |
| F3-56 | 26.92 | 26.1 | 0.82 | P | P |
| F3-57 | 26.77 | 26.14 | 0.63 | P | P |
| F3-58 | Undetermined | 25.57 |  | N | N |
| F3-59 | 26.59 | 26.39 | 0.2 | P | P |
| F3-60 | 25.98 | 24.8 | 1.18 | P | P |
| F3-61 | 25.59 | 24.51 | 1.08 | P | P |
| F3-62 | 25.99 | 25.54 | 0.45 | P | P |
| F3-63 | 26.73 | 27.05 | -0.32 | P | P |
| F3-64 | 24.88 | 23.75 | 1.13 | P | P |
| F3-65 | 26.16 | 26.57 | -0.41 | P | P |
| F3-66 | 27.07 | 27.09 | -0.02 | P | P |
| F3-67 | Undetermined | 24.64 |  | N | N |
| F3-68 | 25.8 | 25.83 | -0.03 | P | P |
| F3-69 | 25.41 | 25.82 | -0.41 | P | P |
| F3-70 | 26.75 | 27.11 | -0.36 | P | P |
| F3-71 | Undetermined | 26.12 |  | N | N |
| F3-72 | 23.53 | 24.25 | -0.72 | P | P |
| F3-73 | 25.81 | 24.65 | 1.16 | P | P |
| F3-74 | 27.58 | 26.7 | 0.88 | P | P |
| F3-75 | 27.26 | 26.98 | 0.28 | P | P |
| F3-76 | 27.87 | 28.77 | -0.9 | P | P |
| F3-77 | 25.85 | 26.19 | -0.34 | P | P |
| F3-78 | 22.12 | 22.27 | -0.15 | P | P |
| F3-79 | 25.45 | 25.6 | -0.15 | P | P |
| F3-80 | 20.57 | 21.03 | -0.46 | P | P |
| F3-81 | 26.48 | 25.6 | 0.88 | P | P |
| F3-82 | Undetermined | 24.22 |  | N | N |
| F3-83 | 25.47 | 25.63 | -0.16 | P | P |
| F3-84 | 25.66 | 26.74 | -1.08 | P | P |
| F3-85 | 25.33 | 25.46 | -0.13 | P | P |
| F3-86 | Undetermined | 25.18 |  | N | N |
| F3-87 | 26.9 | 25.61 | 1.29 | P | P |
| F3-88 | 25.31 | 24.86 | 0.45 | P | P |
| F3-89 | 25.81 | 24.51 | 1.3 | P | P |
| F3-90 | 20.2 | 21.83 | -1.63 | P | P |
| F3-91 | 26.36 | 24.81 | 1.55 | P | P |
| F3-92 | 25.79 | 26.16 | -0.37 | P | P |
| F3-93 | 27.29 | 26.59 | 0.7 | P | P |
| F3-94 | 25.03 | 26.09 | -1.06 | P | P |
| F3-95 | 26.22 | 26.44 | -0.22 | P | P |
| F3-96 | Undetermined | 26.21 |  | N | N |
| F3-97 | Undetermined | 26.54 |  | N | N |
| F3-98 | 23.87 | 24.51 | -0.64 | P | P |
| F3-98 | 26.07 | 26.28 | -0.21 | P | P |
| F3-100 | 24.45 | 24.72 | -0.27 | P | P |
| F3-101 | 24.77 | 25.12 | -0.35 | P | P |
| F3-102 | 26.98 | 25.59 | 1.39 | P | P |
| F3-103 | 25.68 | 25.31 | 0.37 | P | P |
| F3-104 | Undetermined | 23.46 |  | N | N |
| F3-105 | Undetermined | 25.97 |  | N | N |
| F3-106 | 25.37 | 25.95 | -0.58 | P | P |
| F3-107 | 24.82 | 27.39 | -2.57 | P | P |
| F3-108 | 26.73 | 26.86 | -0.13 | P | P |
| F3-109 | 26.04 | 24.58 | 1.46 | P | P |
| F3-110 | 27.9 | 28.63 | -0.73 | P | P |
| F3-111 | 24.34 | 24.31 | 0.03 | P | P |
| F3-112 | Undetermined | 25.77 |  | N | N |
| F3-113 | 28.21 | 28.07 | 0.14 | P | P |
| F3-114 | 26.34 | 26.29 | 0.05 | P | P |
| F3-115 | 27.35 | 27.14 | 0.21 | P | P |
| F3-116 | 25.46 | 26.2 | -0.74 | P | P |
| F3-117 | 25.86 | 25.81 | 0.05 | P | P |
| F3-118 | 25.54 | 24.76 | 0.78 | P | P |
| F3-119 | 24.01 | 24.51 | -0.5 | P | P |
| F3-120 | 27.11 | 26.3 | 0.81 | P | P |
| F3-121 | Undetermined | 23.37 |  | N | N |
| F3-122 | 25.13 | 24.96 | 0.17 | P | P |
| F3-123 | 26.07 | 24.6 | 1.47 | P | P |
| GM-1 | 24.29 | 23.92 | 0.37 | P | P |
| GM-2 | 23.83 | 25.17 | -1.34 | P | P |
| GM-3 | 20.96 | 23.34 | -2.38 | P | P |
| GM-4 | 24.29 | 24.19 | 0.1 | P | P |
| GM-5 | 25.77 | 25.19 | 0.58 | P | P |
| Wild-1 | Undetermined | 24.9 |  | N | N |
| Wild-2 | Undetermined | 26.93 |  | N | N |
| Wild-3 | Undetermined | 27.23 |  | N | N |
| Wild-4 | Undetermined | 25.32 |  | N | N |
| Wild-5 | Undetermined | 25.25 |  | N | N |

Note: Delta Ct was calculated as follows: delta Ct=Ct (target gene)– Ct (*lectin*). *P* positive, *N* negative, *GM* genetically modified, *Wild* wild soybean

**Table S2** Identification of two different genotypes, *EPSPS*-resistant heterozygotes and homozygotes, in F2 or F3 population plants based on droplet digital PCR

| Material | Gene | Average copy number | Copy number ratio | Genotype |
| --- | --- | --- | --- | --- |
| F2-1 | *EPSPS* | 289 | 0.99 | RR |
|  | *lectin* | 291.5 |  |  |
| F2-2 | *EPSPS* | 183.95 | 0.94 | RR |
|  | *lectin* | 194.8 |  |  |
| F2-3 | *EPSPS* | 275 | 0.56 | RS |
|  | *lectin* | 491.5 |  |  |
| F2-5 | *EPSPS* | 166 | 0.52 | RS |
|  | *lectin* | 321 |  |  |
| F2-6 | *EPSPS* | 138 | 0.52 | RS |
|  | *lectin* | 263 |  |  |
| F2-8 | *EPSPS* | 90 | 1.13 | RR |
|  | *lectin* | 79.5 |  |  |
| F2-9 | *EPSPS* | 84.5 | 0.61 | RS |
|  | *lectin* | 138 |  |  |
| F2-10 | *EPSPS* | 35.7 | 0.56 | RS |
|  | *lectin* | 64 |  |  |
| F2-12 | *EPSPS* | 154 | 0.50 | RS |
|  | *lectin* | 311 |  |  |
| F2-13 | *EPSPS* | 95.5 | 0.97 | RR |
|  | *lectin* | 98.5 |  |  |
| F2-14 | *EPSPS* | 206.5 | 0.55 | RS |
|  | *lectin* | 373.5 |  |  |
| F2-16 | *EPSPS* | 319.5 | 0.62 | RS |
|  | *lectin* | 513 |  |  |
| F2-17 | *EPSPS* | 234 | 0.97 | RR |
|  | *lectin* | 241.5 |  |  |
| F2-18 | *EPSPS* | 240 | 0.70 | RS |
|  | *lectin* | 345 |  |  |
| F2-19 | *EPSPS* | 45.8 | 0.81 | RS |
|  | *lectin* | 56.5 |  |  |
| F2-21 | *EPSPS* | 298 | 0.63 | RS |
|  | *lectin* | 471.5 |  |  |
| F2-22 | *EPSPS* | 320.5 | 0.94 | RR |
|  | *lectin* | 342.5 |  |  |
| F2-23 | *EPSPS* | 51 | 0.68 | RS |
|  | *lectin* | 74.5 |  |  |
| F2-25 | *EPSPS* | 187 | 0.51 | RS |
|  | *lectin* | 370 |  |  |
| F2-26 | *EPSPS* | 125 | 1.35 | RR |
|  | *lectin* | 92.5 |  |  |
| F2-27 | *EPSPS* | 178 | 0.59 | RS |
|  | *lectin* | 301 |  |  |
| F2-29 | *EPSPS* | 53.5 | 0.51 | RS |
|  | *lectin* | 104.5 |  |  |
| F2-30 | *EPSPS* | 158 | 0.51 | RS |
|  | *lectin* | 307.5 |  |  |
| F2-31 | *EPSPS* | 58 | 0.66 | RS |
|  | *lectin* | 88 |  |  |
| F2-33 | *EPSPS* | 159 | 0.96 | RR |
|  | *lectin* | 165 |  |  |
| F2-34 | *EPSPS* | 311 | 0.65 | RS |
|  | *lectin* | 479 |  |  |
| F2-35 | *EPSPS* | 228.5 | 1.16 | RR |
|  | *lectin* | 197 |  |  |
| F2-36 | *EPSPS* | 279 | 1.42 | RR |
|  | *lectin* | 196 |  |  |
| F2-38 | *EPSPS* | 128.5 | 0.55 | RS |
|  | *lectin* | 233.5 |  |  |
| F2-39 | *EPSPS* | 117.5 | 0.58 | RS |
|  | *lectin* | 202 |  |  |
| F2-40 | *EPSPS* | 335 | 0.63 | RS |
|  | *lectin* | 529.5 |  |  |
| F2-41 | *EPSPS* | 32 | 0.74 | RS |
|  | *lectin* | 43 |  |  |
| F2-43 | *EPSPS* | 231.5 | 1.04 | RR |
|  | *lectin* | 223 |  |  |
| F2-44 | *EPSPS* | 277 | 0.68 | RS |
|  | *lectin* | 408 |  |  |
| F2-45 | *EPSPS* | 217.5 | 0.52 | RS |
|  | *lectin* | 418.5 |  |  |
| F2-46 | *EPSPS* | 87.5 | 1.18 | RR |
|  | *lectin* | 74 |  |  |
| F2-47 | *EPSPS* | 144.5 | 1.09 | RR |
|  | *lectin* | 133 |  |  |
| F2-48 | *EPSPS* | 283 | 0.54 | RS |
|  | *lectin* | 527.5 |  |  |
| F2-51 | *EPSPS* | 446.5 | 1.15 | RR |
|  | *lectin* | 388.5 |  |  |
| F2-52 | *EPSPS* | 48.5 | 0.52 | RS |
|  | *lectin* | 93.5 |  |  |
| F2-53 | *EPSPS* | 394 | 0.56 | RS |
|  | *lectin* | 706.5 |  |  |
| F2-55 | *EPSPS* | 65.5 | 0.54 | RS |
|  | *lectin* | 121.5 |  |  |
| F2-56 | *EPSPS* | 174 | 0.53 | RS |
|  | *lectin* | 331 |  |  |
| F2-57 | *EPSPS* | 171 | 1.12 | RR |
|  | *lectin* | 152.5 |  |  |
| F2-59 | *EPSPS* | 167 | 0.53 | RS |
|  | *lectin* | 313 |  |  |
| F2-60 | *EPSPS* | 295 | 1.07 | RR |
|  | *lectin* | 276.5 |  |  |
| F2-61 | *EPSPS* | 167 | 0.53 | RS |
|  | *lectin* | 313 |  |  |
| F2-62 | *EPSPS* | 91.5 | 1.18 | RR |
|  | *lectin* | 77.25 |  |  |
| F2-64 | *EPSPS* | 135 | 0.59 | RS |
|  | *lectin* | 230.5 |  |  |
| F2-65 | *EPSPS* | 24.1 | 0.57 | RS |
|  | *lectin* | 42.5 |  |  |
| F2-67 | *EPSPS* | 653 | 0.95 | RR |
|  | *lectin* | 688 |  |  |
| F2-69 | *EPSPS* | 70 | 0.52 | RS |
|  | *lectin* | 133.5 |  |  |
| F2-70 | *EPSPS* | 273 | 1.06 | RR |
|  | *lectin* | 257 |  |  |
| F2-72 | *EPSPS* | 200.5 | 0.52 | RS |
|  | *lectin* | 383.5 |  |  |
| F2-73 | *EPSPS* | 586 | 1.01 | RR |
|  | *lectin* | 578.75 |  |  |
| F2-74 | *EPSPS* | 345.5 | 0.64 | RS |
|  | *lectin* | 539 |  |  |
| F2-75 | *EPSPS* | 177.5 | 0.52 | RS |
|  | *lectin* | 337.5 |  |  |
| F2-77 | *EPSPS* | 197.2 | 1.07 | RR |
|  | *lectin* | 184 |  |  |
| F2-79 | *EPSPS* | 57.5 | 0.62 | RS |
|  | *lectin* | 93 |  |  |
| F2-80 | *EPSPS* | 303.5 | 1.08 | RR |
|  | *lectin* | 280 |  |  |
| F2-81 | *EPSPS* | 71.75 | 1.14 | RR |
|  | *lectin* | 63 |  |  |
| F2-82 | *EPSPS* | 132.5 | 0.58 | RS |
|  | *lectin* | 229.5 |  |  |
| F2-83 | *EPSPS* | 50.7 | 1.08 | RR |
|  | *lectin* | 47 |  |  |
| F2-84 | *EPSPS* | 53.25 | 0.96 | RR |
|  | *lectin* | 55.5 |  |  |
| F2-85 | *EPSPS* | 62 | 0.59 | RS |
|  | *lectin* | 104.5 |  |  |
| F2-87 | *EPSPS* | 190.5 | 0.65 | RS |
|  | *lectin* | 293 |  |  |
| F2-88 | *EPSPS* | 164.5 | 0.88 | RR |
|  | *lectin* | 186.5 |  |  |
| F2-89 | *EPSPS* | 219.5 | 0.71 | RS |
|  | *lectin* | 310 |  |  |
| F2-90 | *EPSPS* | 271 | 1.02 | RR |
|  | *lectin* | 264.5 |  |  |
| F2-91 | *EPSPS* | 359 | 0.55 | RS |
|  | *lectin* | 656 |  |  |
| F2-92 | *EPSPS* | 242.5 | 1.12 | RR |
|  | *lectin* | 217 |  |  |
| F2-94 | *EPSPS* | 128 | 0.61 | RS |
|  | *lectin* | 208.5 |  |  |
| F2-95 | *EPSPS* | 246.5 | 0.56 | RS |
|  | *lectin* | 440 |  |  |
| F2-96 | *EPSPS* | 142 | 0.57 | RS |
|  | *lectin* | 250.5 |  |  |
| F2-97 | *EPSPS* | 351 | 0.54 | RS |
|  | *lectin* | 651 |  |  |
| F2-99 | *EPSPS* | 83 | 0.53 | RS |
|  | *lectin* | 158 |  |  |
| F2-100 | *EPSPS* | 85.5 | 0.56 | RS |
|  | *lectin* | 152 |  |  |
| F2-102 | *EPSPS* | 189.5 | 1.02 | RR |
|  | *lectin* | 186.5 |  |  |
| F2-103 | *EPSPS* | 117 | 0.57 | RS |
|  | *lectin* | 206.5 |  |  |
| F2-104 | *EPSPS* | 191.5 | 0.54 | RS |
|  | *lectin* | 355.5 |  |  |
| F2-106 | *EPSPS* | 69 | 0.51 | RS |
|  | *lectin* | 135 |  |  |
| F2-107 | *EPSPS* | 97 | 0.51 | RS |
|  | *lectin* | 188.5 |  |  |
| F2-108 | *EPSPS* | 109.5 | 0.65 | RS |
|  | *lectin* | 168.5 |  |  |
| F2-109 | *EPSPS* | 32.1 | 1.07 | RR |
|  | *lectin* | 30 |  |  |
| F2-110 | *EPSPS* | 235.5 | 1.08 | RR |
|  | *lectin* | 218 |  |  |
| F2-111 | *EPSPS* | 185.5 | 0.65 | RS |
|  | *lectin* | 286.5 |  |  |
| F2-113 | *EPSPS* | 165 | 0.55 | RS |
|  | *lectin* | 299.5 |  |  |
| F2-114 | *EPSPS* | 198.5 | 0.58 | RS |
|  | *lectin* | 341.5 |  |  |
| F2-115 | *EPSPS* | 212 | 0.67 | RS |
|  | *lectin* | 318.5 |  |  |
| F2-117 | *EPSPS* | 157.5 | 0.57 | RS |
|  | *lectin* | 278.5 |  |  |
| F2-118 | *EPSPS* | 40 | 0.58 | RS |
|  | *lectin* | 69.5 |  |  |
| F2-119 | *EPSPS* | 259 | 0.68 | RS |
|  | *lectin* | 381.5 |  |  |
| F2-120 | *EPSPS* | 511.5 | 1.03 | RR |
|  | *lectin* | 498 |  |  |
| F2-121 | *EPSPS* | 191.5 | 0.60 | RS |
|  | *lectin* | 318 |  |  |
| F2-122 | *EPSPS* | 304.5 | 0.54 | RS |
|  | *lectin* | 568 |  |  |
| F2-124 | *EPSPS* | 349 | 1.10 | RR |
|  | *lectin* | 316 |  |  |
| F2-125 | *EPSPS* | 58 | 0.55 | RS |
|  | *lectin* | 105 |  |  |
| F2-126 | *EPSPS* | 29.5 | 0.58 | RS |
|  | *lectin* | 50.5 |  |  |
| F2-127 | *EPSPS* | 148 | 0.93 | RR |
|  | *lectin* | 159.5 |  |  |
| F2-128 | *EPSPS* | 766.5 | 0.99 | RR |
|  | *lectin* | 773 |  |  |
| F2-129 | *EPSPS* | 73.5 | 0.54 | RS |
|  | *lectin* | 136 |  |  |
| F2-130 | *EPSPS* | 196.5 | 0.53 | RS |
|  | *lectin* | 374 |  |  |
| F2-131 | *EPSPS* | 93 | 0.54 | RR |
|  | *lectin* | 171.5 |  |  |
| F2-132 | *EPSPS* | 443 | 1.00 | RR |
|  | *lectin* | 444.5 |  |  |
| F2-133 | *EPSPS* | 182 | 0.56 | RS |
|  | *lectin* | 325 |  |  |
| F2-135 | *EPSPS* | 79.6 | 0.56 | RS |
|  | *lectin* | 141 |  |  |
| F2-136 | *EPSPS* | 77 | 0.53 | RS |
|  | *lectin* | 146.5 |  |  |
| F2-137 | *EPSPS* | 131.4 | 1.16 | RR |
|  | *lectin* | 113 |  |  |
| F2-138 | *EPSPS* | 220.5 | 0.58 | RS |
|  | *lectin* | 383 |  |  |
| F2-139 | *EPSPS* | 66.55 | 1.04 | RR |
|  | *lectin* | 64 |  |  |
| F2-140 | *EPSPS* | 148.5 | 0.64 | RS |
|  | *lectin* | 231.5 |  |  |
| F2-142 | *EPSPS* | 199.5 | 0.50 | RS |
|  | *lectin* | 396 |  |  |
| F2-143 | *EPSPS* | 235 | 0.97 | RR |
|  | *lectin* | 242.5 |  |  |
| F2-144 | *EPSPS* | 82.5 | 0.54 | RS |
|  | *lectin* | 153 |  |  |
| F2-145 | *EPSPS* | 179.5 | 0.58 | RS |
|  | *lectin* | 312 |  |  |
| F2-146 | *EPSPS* | 423.5 | 1.06 | RR |
|  | *lectin* | 399.5 |  |  |
| F2-147 | *EPSPS* | 117.5 | 0.54 | RS |
|  | *lectin* | 217.5 |  |  |
| F2-148 | *EPSPS* | 220.5 | 0.55 | RS |
|  | *lectin* | 403 |  |  |
| F2-150 | *EPSPS* | 494 | 1.05 | RR |
|  | *lectin* | 472 |  |  |
| F2-151 | *EPSPS* | 341 | 1.10 | RR |
|  | *lectin* | 310 |  |  |
| F2-153 | *EPSPS* | 256.5 | 0.49 | RS |
|  | *lectin* | 521.5 |  |  |
| F2-154 | *EPSPS* | 217.5 | 0.54 | RS |
|  | *lectin* | 399.5 |  |  |
| F2-155 | *EPSPS* | 152.5 | 0.61 | RS |
|  | *lectin* | 248 |  |  |
| F2-156 | *EPSPS* | 266.5 | 0.56 | RS |
|  | *lectin* | 475.5 |  |  |
| F2-158 | *EPSPS* | 176 | 0.57 | RS |
|  | *lectin* | 309.7 |  |  |
| F2-160 | *EPSPS* | 407.5 | 0.54 | RS |
|  | *lectin* | 756.5 |  |  |
| F2-161 | *EPSPS* | 49.2 | 0.94 | RR |
|  | *lectin* | 52 |  |  |
| F2-162 | *EPSPS* | 97.5 | 0.52 | RS |
|  | *lectin* | 187.5 |  |  |
| F2-163 | *EPSPS* | 120 | 0.57 | RS |
|  | *lectin* | 211.5 |  |  |
| F2-165 | *EPSPS* | 136 | 1.13 | RR |
|  | *lectin* | 120 |  |  |
| F2-167 | *EPSPS* | 192.5 | 0.51 | RS |
|  | *lectin* | 376 |  |  |
| F3-1 | *EPSPS* | 376 | 0.97 | RR |
|  | *lectin* | 388.5 |  |  |
| F3-4 | *EPSPS* | 237.5 | 0.58 | RS |
|  | *lectin* | 408 |  |  |
| F3-5 | *EPSPS* | 273.5 | 0.60 | RS |
|  | *lectin* | 458 |  |  |
| F3-7 | *EPSPS* | 506 | 1.05 | RR |
|  | *lectin* | 483.5 |  |  |
| F3-8 | *EPSPS* | 511 | 1.40 | RR |
|  | *lectin* | 365.5 |  |  |
| F3-9 | *EPSPS* | 579.5 | 1.23 | RR |
|  | *lectin* | 473 |  |  |
| F3-11 | *EPSPS* | 270.5 | 0.55 | RS |
|  | *lectin* | 491 |  |  |
| F3-12 | *EPSPS* | 333.5 | 0.53 | RS |
|  | *lectin* | 630.5 |  |  |
| F3-13 | *EPSPS* | 331.5 | 0.59 | RS |
|  | *lectin* | 564 |  |  |
| F3-14 | *EPSPS* | 349.5 | 0.97 | RR |
|  | *lectin* | 359.5 |  |  |
| F3-15 | *EPSPS* | 353.5 | 1.02 | RR |
|  | *lectin* | 345 |  |  |
| F3-16 | *EPSPS* | 234.5 | 0.54 | RS |
|  | *lectin* | 430.5 |  |  |
| F3-17 | *EPSPS* | 255.5 | 0.63 | RS |
|  | *lectin* | 407.5 |  |  |
| F3-19 | *EPSPS* | 112.5 | 0.59 | RS |
|  | *lectin* | 190 |  |  |
| F3-20 | *EPSPS* | 141 | 0.53 | RS |
|  | *lectin* | 265.5 |  |  |
| F3-22 | *EPSPS* | 193 | 0.99 | RR |
|  | *lectin* | 195 |  |  |
| F3-23 | *EPSPS* | 282 | 1.12 | RR |
|  | *lectin* | 251 |  |  |
| F3-24 | *EPSPS* | 64.5 | 0.56 | RS |
|  | *lectin* | 116 |  |  |
| F3-26 | *EPSPS* | 68.5 | 0.51 | RS |
|  | *lectin* | 133.5 |  |  |
| F3-27 | *EPSPS* | 343.5 | 0.98 | RR |
|  | *lectin* | 349 |  |  |
| F3-28 | *EPSPS* | 230 | 1.01 | RR |
|  | *lectin* | 228.5 |  |  |
| F3-29 | *EPSPS* | 114 | 1.16 | RR |
|  | *lectin* | 98.5 |  |  |
| F3-30 | *EPSPS* | 68.5 | 0.58 | RS |
|  | *lectin* | 118 |  |  |
| F3-31 | *EPSPS* | 134 | 0.97 | RR |
|  | *lectin* | 138 |  |  |
| F3-32 | *EPSPS* | 144.5 | 0.97 | RR |
|  | *lectin* | 149.5 |  |  |
| F3-33 | *EPSPS* | 38.5 | 0.51 | RS |
|  | *lectin* | 75 |  |  |
| F3-34 | *EPSPS* | 157.5 | 1.01 | RR |
|  | *lectin* | 155.5 |  |  |
| F3-35 | *EPSPS* | 54.5 | 1.28 | RR |
|  | *lectin* | 42.5 |  |  |
| F3-37 | *EPSPS* | 76 | 1.06 | RR |
|  | *lectin* | 71.5 |  |  |
| F3-38 | *EPSPS* | 53.5 | 0.66 | RS |
|  | *lectin* | 80.5 |  |  |
| F3-39 | *EPSPS* | 116.5 | 0.61 | RS |
|  | *lectin* | 190 |  |  |
| F3-40 | *EPSPS* | 175.5 | 1.06 | RR |
|  | *lectin* | 165.5 |  |  |
| F3-41 | *EPSPS* | 78 | 0.60 | RS |
|  | *lectin* | 131 |  |  |
| F3-43 | *EPSPS* | 251.5 | 0.52 | RS |
|  | *lectin* | 480.5 |  |  |
| F3-44 | *EPSPS* | 274 | 1.04 | RR |
|  | *lectin* | 262.5 |  |  |
| F3-45 | *EPSPS* | 192.5 | 0.74 | RS |
|  | *lectin* | 261.5 |  |  |
| F3-46 | *EPSPS* | 203.5 | 0.61 | RS |
|  | *lectin* | 331 |  |  |
| F3-48 | *EPSPS* | 275.5 | 1.30 | RR |
|  | *lectin* | 212.5 |  |  |
| F3-49 | *EPSPS* | 279.5 | 1.35 | RR |
|  | *lectin* | 206.5 |  |  |
| F3-50 | *EPSPS* | 310 | 1.30 | RR |
|  | *lectin* | 239 |  |  |
| F3-52 | *EPSPS* | 332 | 1.39 | RR |
|  | *lectin* | 239.5 |  |  |
| F3-53 | *EPSPS* | 163 | 0.52 | RS |
|  | *lectin* | 310.5 |  |  |
| F3-54 | *EPSPS* | 143.5 | 0.58 | RS |
|  | *lectin* | 249.5 |  |  |
| F3-55 | *EPSPS* | 163.5 | 0.51 | RS |
|  | *lectin* | 318.5 |  |  |
| F3-56 | *EPSPS* | 148 | 0.63 | RS |
|  | *lectin* | 233.5 |  |  |
| F3-57 | *EPSPS* | 75.5 | 0.56 | RS |
|  | *lectin* | 134 |  |  |
| F3-59 | *EPSPS* | 75.5 | 0.57 | RS |
|  | *lectin* | 133 |  |  |
| F3-60 | *EPSPS* | 48.5 | 0.60 | RS |
|  | *lectin* | 81.5 |  |  |
| F3-61 | *EPSPS* | 61.5 | 0.55 | RS |
|  | *lectin* | 111.5 |  |  |
| F3-62 | *EPSPS* | 155 | 1.37 | RR |
|  | *lectin* | 113.5 |  |  |
| F3-63 | *EPSPS* | 154.5 | 1.32 | RR |
|  | *lectin* | 117 |  |  |
| F3-64 | *EPSPS* | 55 | 0.59 | RS |
|  | *lectin* | 94 |  |  |
| F3-65 | *EPSPS* | 56 | 0.56 | RS |
|  | *lectin* | 99.5 |  |  |
| F3-66 | *EPSPS* | 313.5 | 0.92 | RR |
|  | *lectin* | 339 |  |  |
| F3-68 | *EPSPS* | 302.5 | 1.15 | RR |
|  | *lectin* | 263.5 |  |  |
| F3-69 | *EPSPS* | 266.5 | 0.51 | RS |
|  | *lectin* | 521.5 |  |  |
| F3-70 | *EPSPS* | 259 | 0.60 | RS |
|  | *lectin* | 434.5 |  |  |
| F3-72 | *EPSPS* | 50 | 0.60 | RS |
|  | *lectin* | 84 |  |  |
| F3-73 | *EPSPS* | 70 | 0.64 | RS |
|  | *lectin* | 109.5 |  |  |
| F3-74 | *EPSPS* | 301.5 | 0.94 | RR |
|  | *lectin* | 321 |  |  |
| F3-75 | *EPSPS* | 272.5 | 1.27 | RR |
|  | *lectin* | 214.5 |  |  |
| F3-76 | *EPSPS* | 263 | 0.52 | RS |
|  | *lectin* | 507.5 |  |  |
| F3-77 | *EPSPS* | 265 | 0.54 | RS |
|  | *lectin* | 490 |  |  |
| F3-78 | *EPSPS* | 179.5 | 1.20 | RR |
|  | *lectin* | 150 |  |  |
| F3-79 | *EPSPS* | 182.5 | 0.98 | RR |
|  | *lectin* | 186 |  |  |
| F3-80 | *EPSPS* | 170 | 0.55 | RS |
|  | *lectin* | 309.5 |  |  |
| F3-81 | *EPSPS* | 183 | 0.76 | RS |
|  | *lectin* | 240.5 |  |  |
| F3-83 | *EPSPS* | 32.5 | 0.64 | RS |
|  | *lectin* | 50.5 |  |  |
| F3-84 | *EPSPS* | 134.5 | 0.57 | RS |
|  | *lectin* | 238 |  |  |
| F3-85 | *EPSPS* | 42.5 | 0.52 | RS |
|  | *lectin* | 81.5 |  |  |
| F3-87 | *EPSPS* | 43 | 0.70 | RS |
|  | *lectin* | 61.5 |  |  |
| F3-88 | *EPSPS* | 84.5 | 0.53 | RS |
|  | *lectin* | 158 |  |  |
| F3-89 | *EPSPS* | 74.5 | 0.55 | RS |
|  | *lectin* | 136 |  |  |
| F3-90 | *EPSPS* | 159.5 | 0.68 | RS |
|  | *lectin* | 234.5 |  |  |
| F3-91 | *EPSPS* | 125.5 | 1.00 | RR |
|  | *lectin* | 126 |  |  |
| F3-92 | *EPSPS* | 316 | 0.55 | RS |
|  | *lectin* | 575.5 |  |  |
| F3-93 | *EPSPS* | 296 | 1.32 | RR |
|  | *lectin* | 223.5 |  |  |
| F3-94 | *EPSPS* | 154.5 | 0.52 | RS |
|  | *lectin* | 297 |  |  |
| F3-95 | *EPSPS* | 169 | 0.55 | RS |
|  | *lectin* | 306 |  |  |
| F3-98 | *EPSPS* | 319.5 | 0.58 | RS |
|  | *lectin* | 554.5 |  |  |
| F3-99 | *EPSPS* | 335.5 | 0.62 | RS |
|  | *lectin* | 537.5 |  |  |
| F3-100 | *EPSPS* | 49 | 0.53 | RS |
|  | *lectin* | 93 |  |  |
| F3-101 | *EPSPS* | 128 | 0.57 | RS |
|  | *lectin* | 224.5 |  |  |
| F3-102 | *EPSPS* | 143 | 1.04 | RR |
|  | *lectin* | 137.5 |  |  |
| F3-103 | *EPSPS* | 55 | 1.00 | RR |
|  | *lectin* | 55 |  |  |
| F3-106 | *EPSPS* | 160 | 0.54 | RS |
|  | *lectin* | 297 |  |  |
| F3-107 | *EPSPS* | 179.5 | 0.60 | RS |
|  | *lectin* | 297 |  |  |
| F3-108 | *EPSPS* | 292.5 | 0.98 |  |
|  | *lectin* | 299 |  |  |
| F3-109 | *EPSPS* | 236 | 0.63 | RS |
|  | *lectin* | 375.5 |  |  |
| F3-110 | *EPSPS* | 57.5 | 0.55 | RS |
|  |  | 105 |  |  |
| F3-111 | *EPSPS* | 28.5 | 0.51 | RS |
|  | *lectin* | 56 |  |  |
| F3-113 | *EPSPS* | 376.5 | 1.00 | RR |
|  | *lectin* | 377 |  |  |
| F3-114 | *EPSPS* | 383.5 | 1.25 | RR |
|  | *lectin* | 307.5 |  |  |
| F3-115 | *EPSPS* | 56.5 | 0.56 | RS |
|  | *lectin* | 100.5 |  |  |
| F3-116 | *EPSPS* | 141 | 0.60 | RS |
|  | *lectin* | 234.5 |  |  |
| F3-117 | *EPSPS* | 123 | 0.52 | RS |
|  | *lectin* | 235 |  |  |
| F3-118 | *EPSPS* | 155 | 1.17 | RR |
|  | *lectin* | 133 |  |  |
| F3-119 | *EPSPS* | 150.5 | 0.60 | RS |
|  | *lectin* | 252.5 |  |  |
| F3-120 | *EPSPS* | 29 | 0.62 | RS |
|  | *lectin* | 47 |  |  |
| F3-122 | *EPSPS* | 124.5 | 0.68 | RS |
|  | *lectin* | 183.5 |  |  |
| F3-123 | *EPSPS* | 142.5 | 0.59 | RS |
|  | *lectin* | 239.5 |  |  |
| Wild-1 | *EPSPS* | 0 | 0 | SS |
|  | *lectin* | 343 |  |  |
| Wild-2 | *EPSPS* | 0 | 0 | SS |
|  | *lectin* | 356 |  |  |
| Wild-3 | *EPSPS* | 0 | 0 | SS |
|  | *lectin* | 289.5 |  |  |

Note: *RR* homozygous resistant, *RS* heterozygous resistant, *SS* homozygous susceptible.
